# Supplementary material for: Infection of army ant pupae by two new parasitoid mites (Mesostigmata: Uropodina)
Source: PeerJ. 2017 Oct 10;5:e3870. doi: 10.7717/peerj.3870 (PMC5639873; doi:10.7717/peerj.3870)
Supplement: Table S2 [file peerj-05-3870-s002.xlsx]

## Sheet: Interaction study
Myrmecophile species	Category	Specimen code	Date	Colony ID	Avoided	Unnoticed	Ignored	Groomed	Antennated	Chased	Snapped	Stung	Carried	Attracted by foam	Appeased		Total interactions	Aggression index (AI)
Allopeas myrmekophilos	Snail	SN03	2009-09-04	LD40	0	2	40	0	11	0	0	0	0	0	0		53	0
Allopeas myrmekophilos	Snail	SN03	2009-09-04	LD40	0	3	21	0	19	0	0	0	0	9	0		52	0
Allopeas myrmekophilos	Snail	SN02	2009-09-04	LD40	0	2	17	3	18	0	0	0	0	10	0		50	0
Allopeas myrmekophilos	Snail	SN01	2009-09-04	LD40	0	4	23	9	15	0	0	0	0	0	0		51	0
Allopeas myrmekophilos	Snail	SN02	2009-09-04	LD40	0	10	19	1	13	0	0	0	0	14	0		57	0
Allopeas myrmekophilos	Snail	SN01	2009-09-04	LD40	0	2	29	1	19	0	0	0	0	0	0		51	0
Allopeas myrmekophilos	Snail	SN01	2009-09-04	LD40	0	35	15	0	0	0	0	0	0	0	0		50	0
Allopeas myrmekophilos	Snail	SN01	2009-09-04	LD40	0	1	28	0	21	0	0	0	0	0	0		50	0
Allopeas myrmekophilos	Snail	SN01	2009-09-04	LD40	0	6	31	0	14	0	0	0	0	0	0		51	0
Allopeas myrmekophilos	Snail	SN01	2009-09-04	LD40	0	8	19	0	10	0	0	0	0	13	0		50	0
Allopeas myrmekophilos	Snail	SN02	2009-09-04	LD40	0	6	15	2	12	0	0	0	0	19	0		54	0
Allopeas myrmekophilos	Snail	SN03	2009-09-04	LD40	0	2	35	0	13	0	0	0	0	0	0		50	0
Allopeas myrmekophilos	Snail	SN03	2009-09-04	LD40	0	5	35	0	10	0	0	0	0	0	0		50	0
Macrodinychus spp.	Uropodine mite	MSP01	2008-05-08	LD05	0	33	13	0	2	0	2	2	1	0	0		53	0.0754717
Macrodinychus spp.	Uropodine mite	MSP01	2008-05-08	LD05	0	0	38	6	0	0	6	0	0	0	0		50	0.12
Macrodinychus spp.	Uropodine mite	MSP01	2008-05-08	LD05	0	33	12	0	3	0	3	1	1	0	0		53	0.0754717
Macrodinychus spp.	Uropodine mite	MSP02	2008-05-08	LD05	0	26	23	0	2	0	1	0	1	0	0		53	0.0188679
Macrodinychus spp.	Uropodine mite	MSP02	2008-05-08	LD05	0	13	10	0	12	1	5	7	1	0	0		49	0.265306
Macrodinychus spp.	Uropodine mite	MSP03	2008-05-08	LD05	0	27	17	0	3	0	1	3	1	0	0		52	0.0769231
Macrodinychus spp.	Uropodine mite	MSP03	2008-05-08	LD05	0	29	14	0	4	0	1	3	1	0	0		52	0.0769231
Macrodinychus spp.	Uropodine mite	MSP03	2008-05-08	LD05	0	32	12	0	0	0	2	2	2	0	0		50	0.08
Macrodinychus spp.	Uropodine mite	MSP04	2008-05-08	LD05	0	24	19	0	2	0	2	1	2	0	0		50	0.06
Macrodinychus spp.	Uropodine mite	MSP04	2008-05-08	LD05	0	19	18	0	10	0	1	1	1	0	0		50	0.04
Malayatelura ponerophila	Silverfish	MP01	2008-09-23	LD28	0	34	16	0	0	0	0	0	0	0	0		50	0
Malayatelura ponerophila	Silverfish	MP02	2008-09-23	LD28	2	32	12	0	3	0	1	0	0	0	0		50	0.02
Malayatelura ponerophila	Silverfish	MP03	2008-09-23	LD28	2	37	10	0	1	0	0	0	0	0	0		50	0
Malayatelura ponerophila	Silverfish	MP04	2008-09-23	LD28	4	33	3	3	7	0	0	0	0	0	0		50	0
Malayatelura ponerophila	Silverfish	MP05	2008-09-23	LD28	2	36	12	0	0	0	0	0	0	0	0		50	0
Malayatelura ponerophila	Silverfish	MP06	2008-09-23	LD28	4	5	9	0	1	4	23	0	0	0	0		46	0.586957
Malayatelura ponerophila	Silverfish	MP07	2008-09-23	LD28	1	43	5	0	1	0	0	0	0	0	0		50	0
Malayatelura ponerophila	Silverfish	MP08	2008-09-23	LD28	4	37	7	0	1	1	0	0	0	0	0		50	0.02
Malayatelura ponerophila	Silverfish	MP09	2008-09-23	LD28	2	39	5	1	1	0	2	0	0	0	0		50	0.04
Malayatelura ponerophila	Silverfish	MP10	2008-09-23	LD28	1	34	14	0	1	0	0	0	0	0	0		50	0
Malayatelura ponerophila	Silverfish	MP11	2008-09-23	LD28	2	33	13	0	0	0	2	0	0	0	0		50	0.04
Malayatelura ponerophila	Silverfish	MP12	2008-09-23	LD28	5	29	16	0	0	0	0	0	0	0	0		50	0
Malayatelura ponerophila	Silverfish	MP13	2008-09-23	LD28	4	24	21	1	0	0	0	0	0	0	0		50	0
Malayatelura ponerophila	Silverfish	MP14	2008-09-23	LD28	0	32	18	0	0	0	0	0	0	0	0		50	0
Malayatelura ponerophila	Silverfish	MP15	2008-08-19	LD28	4	12	6	6	2	0	0	0	0	0	0		30	0
Malayatelura ponerophila	Silverfish	MP16	2008-09-23	LD28	3	37	10	0	0	0	0	0	0	0	0		50	0
Malayatelura ponerophila	Silverfish	MP17	2008-09-23	LD28	1	36	14	0	0	0	0	0	0	0	0		51	0
Malayatelura ponerophila	Silverfish	MP18	2008-09-23	LD28	1	35	9	3	2	0	1	0	0	0	0		51	0.0196078
Malayatelura ponerophila	Silverfish	MP19	2008-09-23	LD28	0	37	15	0	0	0	0	1	0	0	0		53	0.0188679
Malayatelura ponerophila	Silverfish	MP20	2008-09-23	LD28	1	35	19	0	0	0	0	0	0	0	0		55	0
Maschwitzia ulrichi	Rove beetle	MU12	2009-03-08	LD30	30	4	3	0	3	2	4	0	0	0	4		50	0.12
Maschwitzia ulrichi	Rove beetle	MU11	2009-03-08	LD30	30	7	3	0	6	7	2	0	0	0	6		61	0.147541
Maschwitzia ulrichi	Rove beetle	MU15	2009-03-30	LD34	21	3	2	0	3	4	1	1	0	0	6		41	0.146341
Maschwitzia ulrichi	Rove beetle	MU15	2009-03-30	LD34	7	15	5	0	1	4	7	1	0	0	10		50	0.24
Maschwitzia ulrichi	Rove beetle	MU16	2009-03-30	LD34	17	9	1	0	0	8	9	0	0	0	8		52	0.326923
Maschwitzia ulrichi	Rove beetle	MU17	2009-03-30	LD34	19	8	4	0	0	12	10	0	0	0	4		57	0.385965
Maschwitzia ulrichi	Rove beetle	MU17	2009-03-30	LD34	13	3	4	0	3	12	6	3	0	0	7		51	0.411765
Maschwitzia ulrichi	Rove beetle	MU18	2009-03-30	LD34	12	8	3	0	0	16	4	0	0	0	12		55	0.363636
Maschwitzia ulrichi	Rove beetle	MU18	2009-03-30	LD34	13	2	3	0	2	16	4	1	0	0	12		53	0.396226
Maschwitzia ulrichi	Rove beetle	MU19	2009-03-30	LD34	15	6	3	0	1	12	9	0	0	0	12		58	0.362069
Maschwitzia ulrichi	Rove beetle	MU02	2009-02-17	LD30	33	5	0	0	1	3	4	0	0	0	6		52	0.134615
Maschwitzia ulrichi	Rove beetle	MU02	2009-02-17	LD30	34	1	1	0	1	5	4	0	0	0	3		49	0.183673
Maschwitzia ulrichi	Rove beetle	MU20	2009-03-30	LD34	16	4	2	0	3	11	1	1	0	0	12		50	0.26
Maschwitzia ulrichi	Rove beetle	MU20	2009-03-30	LD34	15	7	0	0	2	9	6	1	0	0	11		51	0.313725
Maschwitzia ulrichi	Rove beetle	MU04	2009-02-18	LD30	23	4	3	0	7	5	1	0	0	0	7		50	0.12
Maschwitzia ulrichi	Rove beetle	MU07	2009-02-19	Ld30	40	1	0	0	3	6	3	0	0	0	3		56	0.160714
Maschwitzia ulrichi	Rove beetle	MU07	2009-02-19	LD30	37	3	0	0	2	5	4	1	0	0	2		54	0.185185
Maschwitzia ulrichi	Rove beetle	MU09	2009-03-08	LD30	14	6	4	0	3	8	4	1	0	0	9		49	0.265306
Maschwitzia ulrichi	Rove beetle	MU21	2007-09-14	LD10	35	2	2	0	0	3	7	0	0	0	1		50	0.2
Sicariomorpha maschwitzi	Spider	SM01	2009-03-27	LD30	7	27	16	0	0	0	0	0	0	0	0		50	0
Sicariomorpha maschwitzi	Spider	SM02	2009-03-27	LD30	6	26	18	0	0	0	0	0	0	0	0		50	0
Sicariomorpha maschwitzi	Spider	SM03	2009-03-27	LD30	6	25	19	0	0	1	0	0	0	0	0		51	0.0196078
Sicariomorpha maschwitzi	Spider	SM04	2009-03-27	LD30	3	30	17	0	0	0	0	0	0	0	0		50	0
Sicariomorpha maschwitzi	Spider	SM05	2009-03-27	LD30	4	27	20	0	0	0	0	0	0	0	0		51	0
Sicariomorpha maschwitzi	Spider	SM06	2009-03-27	LD30	8	16	26	0	1	0	0	0	0	0	0		51	0
Sicariomorpha maschwitzi	Spider	SM07	2009-03-27	LD30	4	32	15	0	0	0	0	0	0	0	0		51	0
Sicariomorpha maschwitzi	Spider	SM08	2009-03-27	LD30	4	30	17	0	1	0	0	0	0	0	0		52	0
Sicariomorpha maschwitzi	Spider	SM09	2009-03-27	LD30	2	35	13	0	0	0	0	0	0	0	0		50	0
Sicariomorpha maschwitzi	Spider	SM10	2009-03-27	LD30	2	31	17	0	0	0	0	0	0	0	0		50	0
Sicariomorpha maschwitzi	Spider	SM11	2010-04-20	LD2BR	6	27	17	0	0	0	0	0	0	0	0		50	0
Sicariomorpha maschwitzi	Spider	SM12	2010-04-20	LD2BR	2	31	16	0	1	0	0	0	0	0	0		50	0
Sicariomorpha maschwitzi	Spider	SM11	2010-04-20	LD2BR	1	18	15	5	6	3	1	1	0	0	0		50	0.1
Sicariomorpha maschwitzi	Spider	SM13	2010-04-20	LD2BR	3	35	12	0	0	0	0	0	0	0	0		50	0
Sicariomorpha maschwitzi	Spider	SM12	2010-04-20	LD2BR	2	39	9	0	0	0	0	0	0	0	0		50	0
Topelenys gigantea	Rove beetle	TG01	2009-02-26	LD1BR	0	20	17	12	1	0	0	0	0	0	0		50	0
Topelenys gigantea	Rove beetle	TG01	2009-02-26	LD1BR	0	19	14	10	4	0	0	0	0	0	3		50	0
Topelenys gigantea	Rove beetle	TG02	2009-02-26	LD1BR	0	15	13	12	4	0	0	0	0	0	10		54	0
Topelenys gigantea	Rove beetle	TG02	2009-02-26	LD1BR	0	23	12	11	4	0	0	0	0	0	1		51	0
Topelenys gigantea	Rove beetle	TG03	2009-02-26	LD1BR	0	10	7	20	12	0	1	0	0	0	3		53	0.0188679
Witteia dentilabrum	Rove beetle	WD01	2009-02-17	LD30	35	0	0	0	1	8	6	0	0	0	0		50	0.28
Witteia dentilabrum	Rove beetle	WD01	2009-02-17	LD30	30	0	0	0	0	3	12	1	0	0	3		49	0.326531
Witteia dentilabrum	Rove beetle	WD01	2009-09-01	LD41	28	7	3	0	0	9	1	0	0	0	2		50	0.2
Witteia dentilabrum	Rove beetle	WD10	2009-09-01	LD41	24	6	2	0	1	13	4	0	0	0	3		53	0.320755
Witteia dentilabrum	Rove beetle	WD10	2009-09-01	LD41	29	4	1	0	0	10	3	0	0	0	3		50	0.26
Witteia dentilabrum	Rove beetle	WD10	2009-03-08	LD30	28	5	3	0	1	7	4	0	0	0	2		50	0.22
Witteia dentilabrum	Rove beetle	WD13	2009-03-08	LD30	21	0	0	0	1	10	10	2	0	0	10		54	0.407407
Witteia dentilabrum	Rove beetle	WD02	2009-09-03	LD41	20	4	1	0	1	13	7	3	0	0	1		50	0.46
Witteia dentilabrum	Rove beetle	WD02	2009-09-03	LD41	17	3	0	0	0	10	7	10	0	0	5		52	0.519231
Witteia dentilabrum	Rove beetle	WD02	2009-09-03	LD41	17	3	1	0	0	16	7	3	0	0	3		50	0.52
Witteia dentilabrum	Rove beetle	WD03	2009-02-17	LD30	28	4	0	0	0	5	8	0	0	0	5		50	0.26
Witteia dentilabrum	Rove beetle	WD06	2009-02-19	LD30	30	3	0	0	2	5	4	0	0	0	8		52	0.173077
Witteia dentilabrum	Rove beetle	WD08	2009-03-08	LD30	14	4	3	0	1	12	10	3	0	0	4		51	0.490196
Witteia dentilabrum	Rove beetle	WD15	2010-03-11	LD50	25	3	3	0	0	7	9	0	0	0	3		50	0.32
Witteia dentilabrum	Rove beetle	WD16	2010-03-11	LD50	22	4	4	0	0	11	9	0	0	0	0		50	0.4
